# Supplementary material
Source: publisher site journal article supplement (https://www.dovepress.com/article/358426)
Supplement: Supplementary file 1 [file get_supplementary_file.php]

**Supplemental Material**

**Supplemental Table 1** Matrix Problem Definition in AECOPD (on patient level firstly, then HPs secondly; focus on in-patient and the consequent 3 months)

|  | Patients perspective | Health Professional perspective (focus groups1, working groups, consultants) | Quantitative studies and Guidelines | Summary |
| --- | --- | --- | --- | --- |
| Action plans | Difficulty differentiating between a bad day and onset of an AECOPD2-4  Help-seeking behavior is influenced by beliefs about exacerbation (severity, need for treatment) and medication (attitudes towards cortisone, antibiotics) and relationship with HPs.2,3,5  Possibility for self-medication is appreciated5 as easier: no delay, no need for transportation.  Impact of social environment2  Patients cannot recall when they received an action plan.5  Patients typically do not document their symptoms or actions daily. | HP’s do not prescribe action plans routinely → few patients have written action plans.  Formulating action plans is time intensive:  reluctance reflects time constraints  Doubt if every patient can safely manage self-medication  Home Nurse: patients who have an action plan often do not remember or follow them.  No structured education  Support by GP is not actively asked.  Documenting symptoms and actions provides a basis for reflection, exacerbation management | Guidelines recommend use of action plans6  Action plans are not always safe:  Although the broad evidence demonstrates the benefits of action plans with self-medication (steroids and antibiotics), some single studies also show adverse effects of action plans. Meta-analyses have shown detrimental effects, including on terminal ill patients.7  No evidence in COPD could be identified that supported an effect of daily symptom reporting on rehospitalization; however, asthma studies have found that interventions combining symptom monitoring by patients, action plans and regular GP reviews lead to improved health outcomes.8  Symptom monitoring and action plans are elements of most digital telehealth interventions.9 | Patients do not recognize the onset of an exacerbation.2-4 Consequently they do not start following their action plans. Asthma studies show symptom monitoring leads to improved health outcomes.8  As patients’ help-seeking behavior is impacted by diverse factors, their relationships with HPs is particularly important.2,3,5  Patients do not typically have written action plans at home because HPs do not follow the guidelines for action plans—mainly due to time constraints and safety-related doubts. Their doubts are often rooted in single studies reporting detrimental effects in terminal ill patients.7 Without action plans, patients have no written guidance on how to react when experiencing symptoms.  Documentation of symptoms and actions are elements of most digital telehealth interventions,9 providing a basis for reflection and exacerbation management. However, few patients document their symptoms and actions on a daily basis. |
| Physical activity | Dyspnea leads to restriction of physical activity.10  Beliefs regarding COPD (“I am not seriously ill”) and the types and amounts of physical activity needed impact behavior and participation in PR.11,12  Barriers (financial/ professional pressures, fatigue)11-13  No follow-up after PR may hinder long-term implementation of PA in daily life.11 | Physiotherapist not always involved during in-patient stay  HPs do not recommend the PR enough.  PR concentrates strongly on physical activity, lacks a broader focus  Barriers are not explored by HPs.  Knowledge of PA’s importance is not systematically provided by HPs. | Involvement strongly recommended, embedded in pulmonary rehabilitation (ambulatory or stationary)14  Guidelines recommend two supervised training sessions per week. Regarding the frequency, length and intensity of physical training, the GOLD Guidelines remain vague; but a physiotherapist-specific guideline recommends the usual 30 minutes/ day, mixing endurance and resistance training.15  Long-term behavior change is the main challenge.6 | Guidelines recommend 30 min/day supervised activity.14,15  Patients who do not receive information on the importance of PA and PR from their HPs do not understand its importance.  Patients who experience barriers11-13 —but whose HPs do not inform them about overcoming these—are not aware of the available possibilities.  Patients do not build the necessary habits within PR and reduce PA after PR.6,11 |
| Smoking cessation | Difficulty stopping/ strong dependence (life-long)10,16  High motivation because of experience of AECOPD17  “Overfocus” of HPs on this topic17  Patients may restart smoking after AECOPD symptoms subside18. | Smoking cessation counselling is available, but few patients receive referrals.  Conflict to prescribe O2 therapy to smokers (fire hazard)  HPs need communication skills to address this topic with patients.  Reluctance to address smoking cessation because of possible resistance, which may burden the HP/patient relationship  Smoking pause for some days (during hospital stay), but HPs do not capitalize on this opportunity. | GOLD-Guidelines highlight the importance to omit any exposure to particles and recommend smoking cessation in smokers, respectively maintain smoking cessation in ex-smokers6  Smoking cessation is the only evidence-based intervention that slows the accelerated decline in lung function in people with COPD19 | Guidelines recommend zero exposure to tobacco.6,19  Patients who have a life-long habit of smoking are often convinced that stopping smoking is impossible or too difficult.10,16 At the same time, many reduce or stop smoking during AECOPD.  They feel that HPs overemphasize smoking cessation.17 They often experience relapses after AECOPD.18  During AECOPD, patients are ambivalent about smoking and probably more likely to try cessation;17 but HPs do not systematically address these thoughts.  HPs are reluctant to address smoking cessation because of expected resistance from the patient. |

Legend:

AECOPD: acute exacerbations of COPD, GP: general practitioner, HPs: health professionals, PR: pulmonary rehabilitation, PA: physical activity

**Supplemental Table 2** Specific behaviors

| Target behavior (who, what and how often) | | Selection Criteria | | |
| --- | --- | --- | --- | --- |
| Impact on QoL and rehospitalization | Likelihood of performing the behavior | Spillover effect |
| Problem 1 “poor exacerbation management” | | | | |
| 1 | The patient knows which symptoms may signal AE (sputum, breathlessness, coughing). | Low-middle, but prerequisite for "reacting accordingly" | Middle | Positive: awareness of symptoms increases  Negative: focus may shift more towards illness, leading to anxiety |
| 2 | The patient reacts according to a prescribed written exacerbation action plan.  Two action plan variations:  - with self-medication  - without self-medication | High | Middle | Positive: more autonomy  Negative: Risk of overuse of antibiotics or steroids |
| 3 | The patient documents the symptoms and actions in the symptom journal. | Low-middle, but a prerequisite for reflection on exacerbation episodes | Middle | Positive: awareness of symptoms and actions increases  Negative: focus may shift more towards illness |
| Problem 2 “lack of daily physical activity” | | | | |
| 4 | The patient exercises 30 minutes daily. | High | Middle-low | Positive: Increased performance capacity and confidence  Negative: none |
| 5 | The patient exercises regularly under supervision. The frequency is defined per patient. | High | Low | Positive: Encouragement from others, social contact  Negative: Costs for transportation (only partly covered by the assurance) |
| Problem 3 “ongoing smoking” | | | | |
| 6 | Two variations  In Smokers: Smokers forego smoking at all times. | High | Low (at maximum 30% after one year) | Positive: sense of achievement;  Negative: risk of shifting to another dependency |
|  | In Non-smokers or ex-smokers: Maintain non-smoking status at all times. | High | Medium-high (depends on time since cessation) | Positive: None  Negative: None |

**Supplemental Table 3** Need to change – Behavioral Diagnosis

| Behavior(s) | Physical capability (TDF: physical skills) | Psychological capability (TDF: knowledge/ cognitive and interpersonal skills/ memory, attention and decision processes/ behavioral regulation) | Physical opportunity (TDF: environmental context and resources) | Social opportunity (TDF: social influences) | Reflective motivation (TDF: professional and social role and identity / beliefs about capabilities / optimism / beliefs about consequences / intentions / goals) | Automatic motivation (TDF: reinforcement / emotion) |
| --- | --- | --- | --- | --- | --- | --- |
| Note changes in symptoms (sputum, breathlessness, coughing) |  | **knowledge:** understanding earlier exacerbation symptoms/ episodes as exacerbations of COPD and referring to them as such (in contrast to “just a cough or a flu”)  **behavioral regulation:** (daily, continuous/ repeated) attention to a symptom or sign pre-defined by the project team (eg, dyspnea) either to extinguish problematic habits or to establish beneficial ones  **memory, attention and decision processes:** patients with restricted cognitive skills: representative persons who take over management responsibilities (caregivers) |  | (spillover from caregiver) | **professional and social role and identity:** patients acknowledge a) that they have COPD; b) that COPD is a severe health condition, ie, that they are severely ill (identity); and c) that certain symptoms (cough, breathlessness, sputum) may indicate serious changes in their health condition. Patients with responsibilities such as employment need to weigh those against the identity of “having COPD” and appropriately value/ acknowledge the needs that accompany that condition.  **beliefs about capabilities:** belief that they have can influence their symptoms  **beliefs about consequences:** belief that the observed symptoms may indicate a severe problem with serious potential consequences (further damage of the lung) if not treated  **intention:** decision to regularly assess their symptoms  **goals:** preventing future hospitalizations and prioritizing this goal above others (eg, continuing work, not taking a leave of absence). Goals must be set via shared (commonly agreed) decision processes. | **reinforcement :** acknowledging that patients are behaving beneficially by reporting changes  **emotion:** reflecting on the emotions evoked by regular noting of symptoms |
| React accordingly (as specified in the action plan) |  | **knowledge** about criteria for action and actions, effects and side-effects of medication, alternatives to medication (if available); where the patient is cognitively impaired, a representative (caregiver) may take on the necessary responsibilities.  **memory, attention and decision processes**: remember to consult the action plan  **behavioral regulation:** react according to the action plan (which may vary from patients’ intuitively responses)  **cognitive and interpersonal skills**: initiating the taking of new medication | **environmental context and resources:** easy access to the necessary HPs (per phone or email, no need for transportation); having an updated, readable, commonly agreed action plan at hand (digital, routinely reviewed by HP); receiving regular training for action plan | (spillover from caregiver) **social influences:** caregivers support use of action plans; relies upon trustful relationships with HPs | professional and social roles and identity: (as noted above)  **beliefs about capabilities:** patients’ belief that they can follow the action plan  **beliefs about consequences:** belief that they can prevent a deterioration or a hospitalization by following the action plan; one prerequisite is that the action plan is commonly agreed  **intention:** decision to follow the action plan  **goals**: as noted above | **reinforcement :** acknowledgment/ praise when the patient reacts according to the action plan  **emotions:** reflecting which emotions are evoked by following the action plan |
| Document symptoms and actions |  | **behavioral regulation:** daily documentation of symptoms and actions (establishing a beneficial habit)  **memory, attention and decision processes:** for patients with restricted cognitive skills, representative persons (caregivers) are needed to take on the necessary responsibilities | **environmental context and resources:** journal for documenting symptoms and related actions |  | professional and social role and identity: as above  **intention:** decision to regularly document symptoms and actions | **reinforcement :** acknowledgment/ praise when patients document symptoms and actions |
|  |  |  |  |  |  |  |
| Exercise 30 minutes daily | **physical skills:** patients develop skills how to be PA. Those who experience day-to-day deterioration or acute exacerbations develop the skills for being PA despite these barriers | **knowledge:** patients understand the need for PA  **behavior regulation:** patients establish PA as a habit, including strategies to overcome fatigue or depressive feelings | **environmental context and resources:** patients have alternative PA plans in case if the contextual changes (eg, poor weather) | **social influences:** patients establish a social network that motivates them to participate in PA (may include the NICCO Team) | **identity:** patients harmonize their perceptions of PA with felt contradictions (too ill, too old, too busy) and their values in life  **beliefs about consequences:** patients first learn about, then experience PA’s physical and emotional benefits  **optimism:** patients are confident (because of positive experiences) that they can be physically active | **emotions:** patients experience positive feelings during PA (no anxiety due to breathlessness or falls) |
| Exercise regularly under supervision (frequency defined per patient) |  | **knowledge:** patients know the various possibilities of PRs, along with their benefits, relative accessibility, content and time commitment (frequency and length of sessions) | **environmental context and resources:** patients have means of transportation to the PR; patients receive recommendations of PR-institutions that fulfill their personal criteria (eg, continuous high quality, continuous supervision with feedback to patients (feedback is important for feeling safe)) | **social influences:** patients receive recommendations from HPs who they have experienced as trustworthy | **identity (smokers):** smokers harmonize their perception of PR with felt contradictions (I am not worthy, my condition is self-inflicted, I am a smoker**) beliefs about consequences:** patients first understand, then experience the benefits of PR | **emotions:** patients experience positive feelings during PR |
| Maintain smoking cessation |  | **knowledge**: that smoking is cause of COPD; risks and consequences of smoking; the benefits of the prescribed medications  **behavioral regulation**: establishing a new habit // knowing about support programs | **environmental context and resources:** knowledge about how to reduce weight gain; how to arrange for smoke free surroundings with no cues to smoke | **social influences:** resources of health personnel: allow time for patient contact and emotional support; cultivate an attitude that is non-judgmental, non-stigmatizing and blame-free; develop a social environment that is non-smoking and includes no smoking triggers (eg, alcohol, coffee, peers who insist on smoking) | **beliefs about capabilities/intentions:** keep motivation high  **identity:** As motivation is essential, patients must learn to monitor and increase it as necessary(assessment). Attitudes of health personnel**:** non-judgmental/ non-nagging, pressure-free  **goal**: to help patients maintain and stabilize their non-smoking status | **reinforcement:** knowledge:about vulnerable situations (eg, stress); about nicotine dependency and automatic impulses |
| Achieve smoking cessation |  | **knowledge**: that smoking is the major cause of COPD; risks and consequences of smoking; the benefits of the prescribed medications  **behavioral regulation:** establishing a new habit // knowing about support programs | **environmental context and resources:** accessto affordable smoking cessation medication and programs;  knowledge about how to avoid or reduce weight gain; **resources of health personnel:** schedule time for patient contact and personal, tailored interventions | **social influences:** resources of health personnel: schedule time for patient contact and emotional support; maintain a non-judgmental, stigma-free, blame-free attitude environment: a non-smoking social environment with no smoking triggers (eg. alcohol, coffee); be awarethat others have successfully stopped smoking. | **beliefs about capabilities/intentions:** use exacerbation as chance - motivation is probably higher  **identity:** Motivation is necessary - how to measure and increase motivation(assessment) // Attitude of health personnel**:** not judgmental / no nagging / no pressure | **reinforcement:** knowledge:about vulnerable situations (eg stress); about nicotine dependence and automatic impulses |

Legend:

HPs: health professionals, PR: pulmonary rehabilitation, PA: physical activity, TDF: Theoretical Domains Framework

**Supplemental Table 4** Need for change per behavior and COM-B domain

|  | | Physical capability | Psychological capability | Physical opportunity | Social opportunity | Reflective motivation | Automatic motivation |
| --- | --- | --- | --- | --- | --- | --- | --- |
| Note changes in symptoms | |  |  |  |  |  |  |
| React according to the action plan | |  |  |  |  |  |  |
| Document symptoms and actions | |  |  |  |  |  |  |
| Exercise 30 minutes daily | |  |  |  |  |  |  |
| Exercise regularly under supervision | |  |  |  |  |  |  |
| Maintain smoking cessation | |  |  |  |  |  |  |
| Achieve smoking cessation | |  |  |  |  |  |  |
| Legend | | | | | | | |
|  | Need for change | | | | | | |

**Supplemental Table 5** Interventions functions assessed by the APEASE-criteria

|  | | Intervention functions | | | | | | | | |
| --- | --- | --- | --- | --- | --- | --- | --- | --- | --- | --- |
| Education | Persuasion | Incentivization | Coercion | Training | Restriction | Restructuring | Modelling | Enablement |
| Physical capability | |  |  |  |  | 4,5 |  |  |  | 1-7 |
| Psychological capability | | 1-7 |  |  |  | 1-7 |  |  |  | 1-7 |
| Physical opportunity | |  |  |  |  | 1-7 | 1-7 | 1-7 |  | 1-7 |
| Social Opportunity | |  |  |  |  |  | 1-7 | 1-7 | 1-7 | 1-7 |
| Reflective motivation | | 1-7 | 1-7 | 1-7 | 1-7 |  |  |  |  |  |
| Automatic motivation | |  | 1-7 | 1-7 | 1-7 | 1-7 |  | 1-7 | 1-7 | 1-7 |
| Legend:  1) note symptoms; 2) react according an AECOPD action plan; 3) documenting the symptoms and the actions; 4) exercises daily 30 minutes; 5) exercises regularly under supervision; 6) foregoes smoking (smokers); 7) maintains non-smoking (non/ex-smokers) | | | | | | | | | | |
|  | Intervention function meets APEASE criteria not or partly | | | | | | | | | |
|  | Intervention function meets APEASE largely or fully | | | | | | | | | |

**Supplemental Table 6** Policy category assessed by the APEASE-criteria

|  | | Policy Categories | | | | | | |
| --- | --- | --- | --- | --- | --- | --- | --- | --- |
| Communication  / marketing | Guidelines | Fiscal measures | Regulation | Legislation | Environmental / social planning | Service provision |
| Education | |  |  |  |  |  |  |  |
| Persuasion | |  |  |  |  |  |  |  |
| Incentivization | |  |  |  |  |  |  |  |
| Coercion | | NC | NC | NC | NC | NC |  | NC |
| Training | |  |  |  |  |  |  |  |
| Restriction | |  | NC |  | NC | NC |  |  |
| Environmental restructuring | |  |  |  |  |  |  |  |
| Modelling | |  |  |  |  |  |  |  |
| Enablement | |  |  |  |  |  |  |  |
| Legend: | | | | | | | | |
| NC | Policy category not considered | | | | | | | |
|  | Policy category meets APEASE criteria not or partly | | | | | | | |
|  | Policy category meets APEASE criteria largely or fully | | | | | | | |

**Supplemental Table 7** Number of BCTs per intervention package in the basic intervention

| No | BCT | TDF | Exacerbation management | | | | Physical activity | | | | | | Smoking cessation | | | | | | | |
| --- | --- | --- | --- | --- | --- | --- | --- | --- | --- | --- | --- | --- | --- | --- | --- | --- | --- | --- | --- | --- |
| Noting change | Reacting according to action plan | | Documen-ting symptoms and signs | Exercising 30’/day | | | Exercising supervised | | | Smokers | | | | | Non-smokers | | |
| with self-medication | without self-medication |  | | |  | | |  | 01 | 02 | 03 | 04 | 05 | 06 | 07 |
| ANPT | ANPT | ANPT | ANPT | ANPT | PT | PHY | ANPT | PT | PHY | PHY | ANPT | ANPT | ANPT | ANPT | ANPT | ANPT | ANPT |
| 1.1 | goal-setting (behavior) | intentions | 1 |  |  | 1 |  |  |  |  |  |  |  |  |  |  |  |  |  |  |
| goals |  | 1 | 1 | 1 |  |  |  |  |  |  |  |  |  | 1 |  |  |  |  |
| physical skills |  |  |  |  |  | 1 |  |  |  |  |  |  |  |  |  |  |  |  |
| 1.2 | problem solving | physical skills |  |  |  |  | 1 |  |  |  |  |  |  |  |  |  |  |  |  |  |
| emotion |  |  |  |  |  |  |  |  |  |  |  |  | 1 |  |  | 1 |  |  |
| 1.3 | goal setting (outcome) | goals |  | 1 | 1 |  | 1 |  |  |  |  |  |  | 1 | 1 | 1 |  | 1 |  |  |
| 1.4 | action planning | physical skills |  |  |  |  | 2 | 2 |  |  |  |  |  |  |  |  |  |  |  |  |
| emotions |  |  |  |  | 3 |  |  |  |  |  |  |  |  |  |  |  |  |  |
| goals |  | 1 | 1 |  |  |  |  |  |  |  |  |  |  |  |  |  |  |  |
| memory, attention and decision processes |  |  |  |  |  |  |  |  |  |  |  |  |  | 1 |  |  |  |  |
| 1.5 | review behavior goal(s) | goals |  |  |  |  |  |  |  |  |  |  |  |  |  | 1 |  | 1 |  |  |
| 1.6 | discrepancy between current behavior and goal | goals |  |  |  |  |  |  |  |  |  |  |  |  |  |  | 1 |  |  |  |
| 1.8 | behavioral contract | goals |  |  |  |  |  |  |  |  |  |  |  |  | 1 | 1 |  | 1 |  |  |
| 1.9 | commitment | memory, attention and decision processes |  |  |  |  |  |  |  |  |  |  |  |  | 1 |  |  | 1 |  |  |
| goals |  |  |  |  |  |  |  |  |  |  |  | 1 |  | 1 |  |  |  |  |
| 2.2 | feedback on behavior | knowledge |  |  |  |  |  |  |  |  |  |  |  |  |  |  |  |  |  | 2 |
| memory, attention and decision processes |  |  |  |  |  |  |  |  |  |  |  |  |  |  | 1 | 1 | 1 |  |
| 2.3 | self-monitoring of behavior | emotion |  |  |  |  |  |  |  |  |  |  |  |  |  | 2 | 1 |  |  |  |
| beliefs about consequences |  |  |  |  |  |  |  |  |  |  |  |  |  | 1 |  |  |  |  |
| 2.6 | biofeedback | knowledge |  |  |  |  |  | 1 |  |  |  |  |  |  |  |  |  |  |  |  |
| 3.1 | social support | social influences |  |  |  |  | 1 |  |  |  |  |  |  |  |  | 1 |  |  |  |  |
| 4.1 | instruction on how to perform the behavior | goals | 2 | 2 | 2 | 2 | 4 | 1 |  | 1 |  |  |  |  |  |  |  |  |  |  |
| cognitive skills |  | 2 | 2 | 2 |  |  |  |  |  |  |  |  |  |  |  |  |  |  |
| physical skills |  |  |  |  |  | 2 |  |  |  |  |  |  |  | 2 | 1 | 1 |  |  |
| memory, attention and decision processes |  |  |  |  |  |  |  |  |  |  |  |  |  | 1 |  |  |  |  |
| 4.2 | information about antecedents | knowledge | 3 | 4 | 2 | 1 |  |  |  |  |  |  |  | 1 |  | 1 |  | 2 | 1 | 1 |
| emotions |  |  |  |  |  |  |  |  |  |  |  | 1 | 1 | 1 |  |  |  |  |
| 5.1 | information about health consequences | knowledge |  |  |  |  | 1 | 1 | 2 | 1 | 1 | 1 | 1 | 1 | 1 | 2 |  |  |  |  |
| identity |  |  |  |  | 1 |  |  |  |  |  |  |  |  |  |  |  |  |  |
| 5.2 | salience of consequences | beliefs about consequences |  |  |  |  | 1 |  |  | 1 |  |  |  | 1 |  |  |  |  |  |  |
| 5.3 | information about social and environmental consequences | knowledge |  |  |  |  | 2 |  |  |  |  |  |  |  |  |  |  |  |  |  |
| environmental  context |  |  |  |  |  |  |  |  |  |  |  | 1 |  |  |  |  |  |  |
| 5.6 | information about emotional consequences | knowledge |  |  |  |  | 1 |  |  |  |  |  |  |  |  |  |  |  |  |  |
| emotion |  |  |  |  |  |  |  |  |  |  |  | 1 |  |  |  |  |  |  |
| 6.1 | demonstration of the behavior | cognitive skills | 1 | 2 | 2 | 2 |  |  |  |  |  |  |  |  |  |  |  |  |  |  |
| physical skills |  |  |  |  |  | 1 |  |  |  |  |  |  |  |  |  |  |  |  |
| 6.2 | social comparison | social influences |  |  |  |  |  |  |  |  |  |  |  |  |  | 1 |  |  |  |  |
| 6.3 | information about others' approval | optimism |  |  |  |  | 1 |  |  |  |  |  |  |  |  |  |  |  |  |  |
| intention |  |  |  | 1 |  |  |  |  |  |  |  |  |  |  |  |  |  |  |
| 7.1 | prompts/cues | behavior regulation |  |  |  |  | 1 |  |  |  |  |  |  |  |  |  |  |  |  |  |
| environmental  context | 1 | 1 | 1 | 1 |  |  |  |  |  |  |  |  |  |  |  |  |  |  |
| 7.4 | remove access to the reward | emotion |  |  |  |  |  |  |  |  |  |  |  |  | 1 | 1 | 1 | 1 |  |  |
| 8.1 | behavioral practice/ rehearsal | behavior regulation | 1 |  |  | 1 |  |  |  |  |  |  |  |  |  |  |  |  |  |  |
| cognitive skills |  | 1 | 1 | 1 |  |  |  |  |  |  |  |  |  |  |  |  |  |  |
| physical skills |  |  |  |  |  | 1 |  |  |  |  |  |  |  |  |  |  |  |  |
| 8.2 | behavior substitution | emotions |  |  |  |  |  |  |  |  |  |  |  |  |  | 1 |  |  |  |  |
| 8.3 | habit formation | behavior regulation | 1 |  |  | 1 | 1 |  |  |  |  |  |  |  |  |  |  |  |  |  |
| 8.4 | habit reversal | environmental  context |  |  |  |  |  |  |  |  |  |  |  |  |  | 1 |  |  |  |  |
| 9.1 | credible source | beliefs about consequences |  |  |  |  | 1 |  |  | 1 |  |  |  | 1 |  |  |  |  |  |  |
| identity |  |  |  |  | 1 |  |  |  |  |  |  |  |  |  |  |  |  |  |
| intentions |  | 1 | 1 |  |  |  |  |  |  |  |  |  |  |  |  |  |  |  |
| 9.2 | pros and cons | beliefs about capabilities |  |  |  |  |  |  |  |  |  |  |  | 1 |  | 2 |  |  |  |  |
| 10.1 | material incentive (behavior) | knowledge |  |  |  |  |  |  |  |  |  |  |  |  |  | 1 |  |  |  |  |
| 10.4 | social reward | optimism |  |  |  |  |  |  | 1 |  |  |  |  |  |  |  |  |  |  |  |
| reinforcement |  |  |  |  |  |  |  |  |  |  |  |  | 1 | 1 |  | 1 |  |  |
| 10.9 | self-reward | optimism |  |  |  |  | 1 |  |  |  |  |  |  |  |  |  |  |  |  |  |
| reinforcement |  |  |  |  |  |  |  |  |  |  |  |  |  | 1 |  |  |  |  |
| 11.1 | pharmacological support | knowledge |  |  |  |  |  |  |  |  |  |  | 1a | 1 | 1 | 2 |  |  |  |  |
| 11.3 | conserving mental resources | environmental  context |  | 1 | 1 |  |  |  |  |  |  |  |  |  |  |  |  |  |  |  |
| emotions |  |  |  |  |  |  |  |  |  |  |  |  |  | 1 |  |  |  |  |
| 12.1 | restructuring the physical environment | behavior regulation |  |  |  |  | 1 |  |  |  |  |  |  |  |  |  |  |  |  |  |
| environmental  context |  | 2 | 2 | 1 |  |  |  |  |  |  |  |  |  | 1 |  |  |  |  |
| 12.2 | restructuring the social environment | behavior regulation |  |  |  |  | 1 |  |  |  |  |  |  |  |  |  |  |  |  |  |
| social influences |  |  |  |  | 1 |  |  |  |  |  |  |  |  |  |  |  |  |  |
| 12.3 | avoiding/ reducing exposure to cues for the behavior | social influences |  |  |  |  |  |  |  |  |  |  |  |  |  | 1 |  |  |  |  |
| 12.4 | distraction | environmental  context |  |  |  |  |  |  |  |  |  |  |  |  |  | 1 |  |  |  |  |
| 12.5 | adding objects to the environment | physical skills |  |  |  |  | 1 |  |  |  |  |  |  |  |  |  |  |  |  |  |
| environmental  context |  | 1 | 1 | 1 |  |  |  |  |  |  |  |  |  |  |  |  |  |  |
| 13.2 | framing / reframing | identity |  |  |  |  | 1 |  |  |  |  |  |  |  |  |  |  |  |  |  |
| 13.3 | incompatible beliefs | identity |  |  |  |  | 1 |  |  |  |  |  |  |  |  |  |  |  |  |  |
| 13.4 | valued self-identity | identity |  |  |  |  | 1 |  |  |  |  |  |  |  |  |  |  |  |  |  |
| 13.5 | identity associated with behavior to be changed | identity |  |  |  |  | 1 |  |  |  |  |  |  |  |  |  |  |  |  |  |
| emotion |  |  |  |  |  |  |  |  |  |  |  |  |  | 1 | 1 | 1 |  |  |
| 14.1 | remove punishment | environmental  context |  |  |  |  |  |  |  | 2 |  |  |  |  |  |  |  |  |  |  |
| 15.1 | verbal persuasion about capability | optimism |  |  |  |  | 1 |  |  |  |  |  |  | 2 |  | 1 | 1 | 1b | 1b |  |
| beliefs capability | 1 | 1 | 1 | 1 |  |  |  |  |  |  |  |  |  |  |  |  |  |  |
| 15.3 | focus on past success | behavioral regulation |  |  |  |  |  |  |  |  |  |  |  | 1 |  | 1 |  |  |  |  |
| No of all BCTs per Intervention package (with repetition) | | | 11 | 21 | 19 | 17 | 33 | 10 | 3 | 6 | 1 | 1 | 2 | 14 | 9 | 35 | 7 | 13 | 3 | 3 |
| No of different BCTs (total available: 93) | | | 8 | 13 | 13 | 11 | 22 | 7 | 2 | 5 | 1 | 1 | 2 | 12 | 9 | 27 | 7 | 12 | 3 | 2 |

Legend:

a only in smokers

b only if confidence < 7

ANPT: advanced nursing practice nurse team, PT: physiotherapist, PHY: physician

**References**

1. Schmid-Mohler G, Clarenbach C, Brenner G, et al. Advanced nursing practice in COPD exacerbations: the solution for a gap in Switzerland? *ERJ open research*. Apr 2020;6(2)doi:10.1183/23120541.00354-2019

2. Korpershoek Y, Vervoort S, Nijssen L, Trappenburg J, Schuurmans MJ. Factors influencing exacerbation-related self-management in patients with COPD: a qualitative study. *Int J Chron Obstruct Pulmon Dis*. 2016;11:2977-2990. doi:10.2147/copd.s116196

3. Williams V, Hardinge M, Ryan S, Farmer A. Patients' experience of identifying and managing exacerbations in COPD: a qualitative study. *NPJ Prim Care Respir Med*. Sep 18 2014;24:14062. doi:10.1038/npjpcrm.2014.62

4. Brandt CL. Study of older adults' use of self-regulation for COPD self-management informs an evidence-based patient teaching plan. *Rehabilitation nursing : the official journal of the Association of Rehabilitation Nurses*. Jan-Feb 2013;38(1):11-23. doi:10.1002/rnj.56

5. Laue J, Melbye H, Risor MB. Self-treatment of acute exacerbations of chronic obstructive pulmonary disease requires more than symptom recognition - a qualitative study of COPD patients' perspectives on self-treatment. *BMC Fam Pract*. Jan 25 2017;18(1):8. doi:10.1186/s12875-017-0582-8

6. Global Initiative for Chronic Obstructive Lung Disease. *Global strategy for the diagnosis, management, and prevention of chronic obstrucitve pulmonary disease: 2022 report*. 2021.

7. Lenferink A, Brusse-Keizer M, van der Valk PD, et al. Self-management interventions including action plans for exacerbations versus usual care in patients with chronic obstructive pulmonary disease. *The Cochrane database of systematic reviews*. Aug 4 2017;8:Cd011682. doi:10.1002/14651858.CD011682.pub2

8. Gibson PG, Powell H, Coughlan J, et al. Self-management education and regular practitioner review for adults with asthma. *The Cochrane database of systematic reviews*. 2003;(1):CD001117. doi:10.1002/14651858.CD001117

9. Janjua S, Banchoff E, Threapleton CJ, Prigmore S, Fletcher J, Disler RT. Digital interventions for the management of chronic obstructive pulmonary disease. *The Cochrane database of systematic reviews*. Apr 19 2021;4:CD013246. doi:10.1002/14651858.CD013246.pub2

10. Chang YY, Dai YT, Chien NH, Chan HY. The Lived Experiences of People With Chronic Obstructive Pulmonary Disease: A Phenomenological Study. *Journal of nursing scholarship : an official publication of Sigma Theta Tau International Honor Society of Nursing*. Sep 2016;48(5):466-71. doi:10.1111/jnu.12230

11. Thorpe O, Kumar S, Johnston K. Barriers to and enablers of physical activity in patients with COPD following a hospital admission: a qualitative study. *Int J Chron Obstruct Pulmon Dis*. 2014;9:115-28. doi:10.2147/copd.s54457

12. Mathar H, Fastholm P, Lange P, Larsen NS. Why do patients decline participation in offered pulmonary rehabilitation? A qualitative study. *Clinical rehabilitation*. 2017;31(12):1674-1683. doi:10.1177/0269215517708821

13. Kosteli MC, Heneghan NR, Roskell C, et al. Barriers and enablers of physical activity engagement for patients with COPD in primary care. *Int J Chron Obstruct Pulmon Dis*. 2017;12:1019-1031. doi:10.2147/copd.s119806

14. Puhan MA, Gimeno-Santos E, Cates CJ, Troosters T. Pulmonary rehabilitation following exacerbations of chronic obstructive pulmonary disease. *The Cochrane database of systematic reviews*. Dec 8 2016;12:CD005305. doi:10.1002/14651858.CD005305.pub4

15. Langer D, Hendriks E, Burtin C, et al. A clinical practice guideline for physiotherapists treating patients with chronic obstructive pulmonary disease based on a systematic review of available evidence. *Clinical rehabilitation*. May 2009;23(5):445-62. doi:10.1177/0269215509103507

16. Bartlett YK, Sheeran P, Hawley MS. Effective behaviour change techniques in smoking cessation interventions for people with chronic obstructive pulmonary disease: a meta-analysis. *British journal of health psychology*. 2014;19(1):181-203. doi:10.1111/bjhp.12071

17. Torheim H, Kvangarsnes M. How do patients with exacerbated chronic obstructive pulmonary disease experience care in the intensive care unit? *Scand J Caring Sci*. Dec 2014;28(4):741-8. doi:10.1111/scs.12106

18. Andersen IC, Thomsen TG, Bruun P, Bødtger U, Hounsgaard L. The experience of being a participant in one’s own care at discharge and at home, following a severe acute exacerbation in chronic obstructive pulmonary disease: A longitudinal study. *International Journal of Qualitative Studies on Health and Well-being*. 2017;12(1)doi:10.1080/17482631.2017.1371994

19. Van Eerd EA, Van der Meer RM, Van Schayck OC, Kotz D. Smoking cessation for people with chronic obstructive pulmonary disease. *Cochrane Database of Systematic Reviews*. Aug 20 2016;(8)CD010744. doi:10.1002/14651858.CD010744.pub2
